# Supplementary material
Source: publisher site journal article supplement (https://www.spandidos-publications.com/7126/downloadSupplementary)
Supplement: Supplementary file 1 [file downloadSupplementary]

## Sheet: Sheet1
Table SIII. Gene summary for the hypertension group (n=16).
HUGO symbol	In-frame deletion	In-frame insertion	Missense mutation	Nonsense mutation	Splice site	Total	Mutated samples	Altered samples
EGFR	2	1	11	0	0	14	12	12
TP53	2	0	10	1	1	14	9	9
ERBB2	0	0	3	0	0	3	2	2
FBXW7	0	0	2	0	0	2	2	2
ALK	0	0	5	0	0	5	1	1
APC	0	0	1	0	0	1	1	1
CBR3	0	0	1	0	0	1	1	1
CDKN2A	0	0	1	0	0	1	1	1
FGFR3	0	0	1	0	0	1	1	1
HRAS	0	0	1	0	0	1	1	1
RET	0	0	1	0	0	1	1	1
SMO	0	0	1	0	0	1	1	1
SOD2	0	0	1	0	0	1	1	1
UGT1A1	0	0	1	0	0	1	1	1
HUGO, Human Genome Organisation.
